# Supplementary material
Source: Research Square preprint supplement (doi:10.21203/rs.3.rs-9247163/v1)
Supplement: Supplementary file 1 [file 1ee41f04e11ca11a88a5757c.docx]

A techno-economic framework evaluating coal ash feedstocks for multi-product resource recovery.

Supplementary Information

Shelvey Swett1, Emma Kocik2, Mohadeseh Rastgooy Deylami1, Jon Hawkings2, Jennifer Wilcox1

University of Pennsylvania, 1Department of Chemical and Biomolecular Engineering, 220 S 33rd St Towne Building, Philadelphia, PA 19104

2Department of Earth and Environmental Sciences, 240 South 33rd Street 251 Hayden Hall, Philadelphia, PA 19104

Corresponding author: [sswett@seas.upenn.edu](mailto:sswett@seas.upenn.edu) (T) 360-970-4239

**SUPPORTING INFORMATION**

## Supplementary data feeding into the process model

SI Table 1: Coproduct mass for each feedstock (based on 1 tonne ash processed) and the corresponding CO2 equivalents avoided with coproduct displacement.

|  | Coproduct mass | | | | CO2e avoided via coproduct displacement | | | |
| --- | --- | --- | --- | --- | --- | --- | --- | --- |
|  | S | D | M | C | S | D | M | C |
| SiO2 | 900 kg | 900 kg | 900 kg | 900 kg | 918 kg | 918 kg | 918 kg | 918 kg |
| Al(OH)3 | 31 kg | 35 kg | 71 kg | 59 kg | 18.2 kg | 20.6 kg | 42 kg | 35 kg |
| Fe(OH)3 | 123 kg | 39 kg | 196 kg | 35 kg | 270 kg | 85.6 kg | 430 kg | 77 kg |
| REE(OH)3 | 213 g | 132 g | 102 g | 181 g | 9.1 kg | 5.62 kg | 4.34 kg | 7.7 kg |
| Ti(OH)4 | 38 kg | 2.08 kg | 2.3 kg | 1.38 kg | 652 kg | 35.7 kg | 39 kg | 24 kg |
| Mn(OH)2 | 0.88 kg | 126 g | 197 g | 20 g | 0.40 | 57.0 g | 89 g | 9 g |
| Co(OH)2 | 63 g | 33 g | 40 g | 34 g | 742 g | 389 g | 471 g | 400 g |
| Ni(OH)2 | 133 g | 46 g | 72 g | 24 g | 578 g | 200 g | 313 g | 104 g |
| Cu(OH)2 | 401 g | 103 g | 93 g | 112 g | 74.3 g | 19.1 g | 17.2 g | 21 g |
| Zn(OH)2 | 254 g | 53 g | 117 g | 46 g | 109 g | 22.7 g | 50 g | 20 g |
| Total | | | | | 1869 kg | 1066 kg | 1435 kg | 1061 kg |
| Total in separation stage | | | | | 951 kg | 148 kg | 517 kg | 143 kg |

SI Table 2. Feedstock composition and leaching efficiency

| Element | C | | M | | D | | S | |
| --- | --- | --- | --- | --- | --- | --- | --- | --- |
|  | **Mass (g) in 1 t ash** | **Mass (g) extracted** | **Mass (g) in 1 t ash** | **Mass (g) extracted** | **Mass (g) in 1 t ash** | **Mass (g) extracted** | **Mass (g) in 1 t ash** | **Mass (g) extracted** |
| **Be** | 13.91 | 5.05 | -- | -- | -- | -- | -- | -- |
| **Na** | 4301.44 | 155.35 | 13820.02 | 10774.08 | 6698.92 | 271.94 | 24363.02 | 12712.69 |
| **Mg** | 3499.08 | 3838.66 | 4751.46 | 2301.65 | 7403.54 | 1328.50 | 48344.49 | 47607.21 |
| **Al** | 84275.94 | 21451.72 | 113847.4 | 25839.15 | 36526.88 | 12770.25 | 32617.07 | 11415.97 |
| **Si** | 533053.7 | 0.00 | 508512.6 | 127.89 | 677478.0 | 2601.76 | 303226.0 | 1699.17 |
| **K** | 22971.91 | 1106.69 | 34398.65 | 2073.89 | 41440.72 | 1220.06 | 5227.16 | 2398.33 |
| **Ca** | 176697.8 | 162370.6 | 32405.46 | 15734.06 | 45602.84 | 11929.64 | 342433.9 | 317055.8 |
| **Ti** | 3111.02 | 600.80 | 22461.47 | 983.35 | 23664.29 | 906.07 | 20770.77 | 16565.65 |
| **V** | 111.51 | 10.53 | -- | -- | -- | -- | -- | -- |
| **Cr** | 78.34 | 21.26 | 434.56 | 105.77 | 471.31 | 22.97 | 160.68 | 139.57 |
| **Mn** | 81.96 | 12.80 | 465.76 | 128.31 | 408.43 | 82.25 | 754.75 | 571.93 |
| **Fe** | 40520.12 | 19527.43 | 267346.5 | 107813.2 | 158263.5 | 21483.82 | 87424.11 | 67791.96 |
| **Co** | 21.65 | 22.59 | 136.32 | 26.75 | 221.77 | 21.80 | 57.10 | 42.53 |
| **Ni** | 70.78 | 15.86 | 243.13 | 47.70 | 332.46 | 30.96 | 117.53 | 88.74 |
| **Cu** | 109.78 | 76.95 | 273.60 | 63.89 | 566.36 | 70.85 | 395.63 | 275.00 |
| **Zn** | 83.33 | 31.80 | 322.67 | 80.84 | 210.56 | 36.93 | 246.93 | 175.90 |
| **Ga** | 42.46 | 18.92 | -- | -- | -- | -- | -- | -- |
| **Ge** | 23.08 | 6.07 | 84.33 | 24.07 | 61.11 | 11.14 | 7.70 | 3.12 |
| **As** | 131.22 | 42.77 | -- | -- | -- | -- | -- | -- |
| **Se** | 16.71 | 6.45 | -- | -- | -- | -- | -- | -- |
| **Rb** | 49.97 | 0.00 | -- | -- | -- | -- | -- | -- |
| **Sr** | 490.96 | 26.12 | -- | -- | -- | -- | -- | -- |
| **Cd** | 8.04 | 2.53 | -- | -- | -- | -- | -- | -- |
| **Cs** | 9.48 | 1.27 | -- | -- | -- | -- | -- | -- |
| **Ba** | 427.77 | 22.68 | -- | -- | -- | -- | -- | -- |
| **La** | 52.56 | 2.24 | 73.72 | 13.41 | 104.72 | 18.17 | 47.64 | 32.59 |
| **Ce** | 110.24 | 56.70 | 201.81 | 30.26 | 237.85 | 39.07 | 113.61 | 64.46 |
| **Pr** | 29.49 | 11.14 | 21.12 | 3.47 | 29.16 | 4.72 | 14.54 | 7.90 |
| **Nd** | 65.39 | 24.94 | 120.92 | 18.83 | 145.84 | 23.56 | 69.95 | 37.96 |
| **Sm** | 16.22 | 5.67 | 17.59 | 3.15 | 25.51 | 4.25 | 12.08 | 6.09 |
| **Eu** | 7.91 | 0.00 | 2.10 | 0.70 | 5.22 | 0.90 | 2.66 | 1.38 |
| **Gd** | 13.66 | 9.48 | 12.06 | 3.30 | 22.79 | 4.39 | 10.64 | 5.58 |
| **Tb** | 6.10 | 4.47 | 3.15 | 0.56 | 0.00 | 0.00 | 0.00 | -- |
| **Dy** | 13.87 | 8.55 | 14.92 | 3.05 | 23.83 | 3.94 | 10.17 | 5.00 |
| **Ho** | 6.67 | 3.58 | 4.18 | 0.63 | 4.90 | 0.78 | 1.99 | 0.99 |
| **Er** | 9.59 | 7.23 | 7.35 | 1.67 | 13.96 | 2.15 | 5.58 | 2.73 |
| **Tm** | 5.70 | 4.90 | 1.38 | 0.23 | 1.90 | 0.29 | 0.80 | 0.36 |
| **Lu** | 5.41 | 2.40 | 1.02 | 0.20 | 1.64 | 0.26 | 1.03 | 0.49 |
| **Hf** | 14.96 | 37.08 | -- | -- | -- | -- | -- | -- |
| **Ta** | 14.93 | 1.12 | -- | -- | -- | -- | -- | -- |
| **Pb** | 40.55 | 1.02 | -- | -- | -- | -- | -- | -- |
| **Th** | 190.91 | 71.39 | -- | -- | -- | -- | -- | -- |
| **U** | 18.89 | 5.05 | 14.81 | 4.42 | 32.04 | 3.88 | 13.28 | 4.41 |

SI Table 3. Costs of energy use

|  | **c / MJ** |
| --- | --- |
| Decarbonized grid | 3.28 |
| High cost (RI) grid | 5.43 |
| Low cost (KY) grid | 1.88 |

SI Table 4. Costs for resource use

|  | **Price** | **Source** |
| --- | --- | --- |
| Hydrochloric acid (virgin) | $0.04/lb | [1] |
| Sodium hydroxide (virgin) | $0.29/lb | [1] |
| Ultrapure water | $0.45-$3.00/m3 | [2] |
| Waste water treatment | $5.10/m3 | [3] |
| 30% MEA | $1.17/kg | [4] |
| Activated carbon | $2.35/kg | [5] |

SI Table 5. Particle size distributions (D80 is calculated with linear interpolation)

| **Ash** | **D10** | **D50** | **D80** | **D90** |
| --- | --- | --- | --- | --- |
|  | μm | | | |
| C | 5.9 | 62.7 | 461.175 | 594 |
| M | 8.3 | 43.6 | 116.425 | 140.7 |
| D | 7.2 | 62.3 | 188.45 | 230.5 |
| S | 1.8 | 11.8 | 51.175 | 64.3 |

SI Table 6. Bond work indices for selected materials

| **Mineral** | **Wi** |
| --- | --- |
| Coal | 11.37 |
| Gypsum rock | 8.16 |
| Iron ore (magnetite) | 10.21 |
| Limestone | 11.61 |
| Quartzite | 12.18 |
| Silica | 13.53 |
| Average of above | 11.18 |

SI Table 7. Heating specifications

| **Parameter** | **Value** |
| --- | --- |
| Ash heat capacity, cP | 840 J/kgK |
| Water heat capacity, cP | 4184 J/kgK |
| 6M HCl heat capacity, cP | 6050 J/kgK |
| Water heat of vaporization, Hv | 2.26 J/kg |
| Convective heat transfer coefficient through air, h | 20 W/m2K |
| Ambient temperature, TA | 298 K |
| Emissivity of insulation, ε | 0.05 |
| Reactor fluid temperature, TR | 363 K |
| Inner tank radius, rI | 0.860 m |
| Outer tank radius (including insulation), rO | 0.955 m |
| Non-insulated tank radius, rS | 0.905 m |
| Thermal conductivity of insulation, kI | 0.03 W/mK |
| Thermal conductivity of steel, kS | 14.4 W/mK |

SI Table 8. Mixing specifications

|  | **Tank volume (m3)** | **Tank diameter (m)** | **Impeller diameter (m)** | **Solution density (kg/m3)** |
| --- | --- | --- | --- | --- |
| Extraction | 20 | 1.72 | 0.57 | 1160.65 |
| Separation 1 | 44.32 | 2.24 | 0.74 | 1115.26 |
| Separation 2 | 41.93 | 2.20 | 0.73 | 1112.18 |
| Separation 3 | 42.21 | 2.21 | 0.73 | 1171.09 |
| Carbonation | 2.40 | 0.85 | 0.28 | 1111.62 |

SI Table 9. Pumping specifications

| **Fluid** | **Specific gravity** |
| --- | --- |
| Stock HCl | 1.18349486 |
| 6M HCl | 1.139530306 |
| Water | 1 |
| Leachate (post acid leach) | 1.073169068 |
| 5M NaOH | 1.188509669 |
| Filtrate 1 | 1.115293462 |
| Filtrate 2 | 1.115293462 |
| Filtrate 3 | 1.125323079 |
| Post leach slurry | 1.141113398 |
| Fe/Al OH slurry | 1.177422344 |
| REE/CM OH slurry | 1.143854912 |
| Ca/Mg OH slurry | 1.178402932 |
| Ca/Mg CO3 slurry | 1.159090909 |

SI Table 10. Reagent electrochemical regeneration parameters from [6].

| **Parameter** | **Value** |
| --- | --- |
| Energy demand per mol acid/base generated | Range 0.029 – 0.071 kWh/mol |

SI Table 11. Transport cost calculations parameters from [7]. Coal transport is used as a proxy for coal ash transport.

| **Parameter** | **Value** |
| --- | --- |
| Speed | 11.1 mph |
| Base rate | $4,513/rail car |
| Fuel surcharge | $0.17/mile*car |
| Operator salary | $45,229/yr |
| Operator salary | $21.74/hr |

SI Table 12. Capital costing values.

| **Economic term** | | **Value** |
| --- | --- | --- |
| Total bare module price | CTBM | $3,167,041.12 |
| Cost of direct permanent investment | CDPI | $3,642,097.29 |
| Total depreciable capital | CTDC | $4,297,674.81 |
| Corrected total permanent investment | CTPI correct | $4,327,758.53 |
| Total capital investment | CTCI | $5,230,998.66 |

SI Table 13. OPEX values.

| **Economic term** | **Value ($/yr)** |
| --- | --- |
| Energy, reagent, and water (processing costs)   - Optimistic - Neutral - Pessimistic | $2,617,813.60  $3,031,702.03  $4,070,972.30 |
| Operations | $565,860.00 |
| Maintenance | $299,762.82 |
| Overhead | $197,362.00 |
| Property taxes & insurance | $85,953.50 |
| Depreciation | $343,813.98 |
| Cost of manufacture   - Optimistic - Neutral - Pessimistic | $4,110,565.90  $4,524,454.33  $5,563,724.60 |

## References

1. Seider W, Lewin DR, Seader JD, Widagdo S, Gani R, Ng KM. Product and Process Design Principles: Synthesis, Analysis and Evaluation. 4th ed. Wiley; 2016.

2. Schwantes R, Morales Y, Pomp E, Singer J, Chavan K, Saravia F. Thermally driven ultrapure water production for water electrolysis – A techno-economic analysis of membrane distillation. Desalination. 2025 Aug;608. doi:https://doi.org/10.1016/j.desal.2025.118848

3. Wheeler SA, Nauges C, Grafton RQ. Water Pricing, Costs and Markets [Technical Report for the Global Commission on the Economics of Water] [Internet]. 2023 Feb. Report No. Available from: https://watercommission.org/wp-content/uploads/2023/03/Wheeler.pdf

4. Business AnalytiQ. Monoethanolamine price index.

5. Business AnalytiQ. Activated carbon prices.

6. Wright JG, Kanan MW. Electrochemical Production of >1 M Acid and Base from Neutral Salt at High Current Density and Low Energy Demand. ACS Energy Letters. 2025;10:5328–35. doi:https://doi.org/10.1021/acsenergylett.5c02318

7. Myers C, Li W, Markham G. The cost of CO2 transport by truck and rail in the United States. International Journal of Greenhouse Gas Control. 2024 May;134. doi:https://doi.org/10.1016/j.ijggc.2024.104123
